# Supplementary material for: Deciphering the olfactory repertoire of the tiger mosquito Aedes albopictus
Source: PubMed Central journal article supplement (PMC5637092; doi:10.1186/s12864-017-4144-1), 2017-10-11
Supplement: 12864_2017_4144_MOESM2_ESM.pdf [file 12864_2017_4144_MOESM2_ESM.pdf]

Table S5. Properties of primers used in this study.

| <b>Primer name</b> | <b>Sequence</b>          | <b>Lenght</b> | <b>% C-G</b> | <b>Tm</b> | <b>Product size</b> |
|--------------------|--------------------------|---------------|--------------|-----------|---------------------|
| 013336_S5_F        | GTGCCACCGTGCTATAAAGTCCGT | 24            | 54.20        | 64.40     | 101                 |
| 013336_S5_R        | ACGCCTTGACCACATGCTGAACGT | 24            | 54.20        | 64.40     |                     |
| OBP83_F            | ACGTGGGCCCTCAAATGTCGCA   | 22            | 59.10        | 64.00     | 112                 |
| OBP83_R            | TGCTGCTCTTGTTCTCTGCCTCGG | 24            | 56.50        | 64.20     |                     |
| OBP27_F            | TGATGGACCTTACTCACACCGCGA | 24            | 59.09        | 67.24     | 97                  |
| OBP27_R            | AACGGCTCTCTGTAGTCATCCGGT | 24            | 58.33        | 66.95     |                     |
| OBP36_F            | GTGGGTATCGAAATGACGGCCAGT | 24            | 54.17        | 65.71     | 86                  |
| OBP36_R            | CCGTTGAACCGAGCTATGGACTCC | 24            | 54.17        | 65.26     |                     |
| OBP47_F            | CCACAGTGGCAACCGATAGTCAGC | 24            | 54.17        | 65.02     | 103                 |
| OBP47_R            | AGCTTGGTTTTAGCTTGGCACCGG | 24            | 58.33        | 65.03     |                     |
| Orco_F             | ACGGCCAACACCATAACGACGCT  | 23            | 58.33        | 65.73     | 104                 |
| Orco_R             | TTCCAGATTTCCAGCGTGCGGT   | 22            | 58.33        | 68.17     |                     |
| Or8_F              | GACTACGATTACAGCGCGGCGA   | 22            | 56.52        | 67.19     | 120                 |
| Or8_R              | TGTGCCGAACCTTGCTGCGGA    | 20            | 59.09        | 66.75     |                     |
| Or84_F             | AGCTGGCCTCTGGAAAACGGT    | 21            | 59.09        | 65.15     | 127                 |
| Or84_R             | CCAGGCGAACAATGCAAAAGGGT  | 23            | 60.00        | 65.38     |                     |
| Gr3_F              | TGCGGTGTGTTCTTCATGGCACT  | 23            | 57.10        | 61.80     | 89                  |
| Gr3_R              | AAGCGACCTTCCAACGTGCGGA   | 22            | 57.20        | 62.40     |                     |
| Gr58_F             | CGGCCCTAGTCTACAGAGCAAGCA | 24            | 52.17        | 65.29     | 114                 |
| Gr58_R             | TCTGCATTGACAGGGCACGCA    | 21            | 59.09        | 67.15     |                     |
| NMDAR1_F           | AGACGGTAGAGCAGTACTAGGGCG | 24            | 58.33        | 66.05     | 86                  |
| NMDAR1_R           | TGCTCTCTACAGTGGCACGAACGT | 24            | 57.14        | 65.22     |                     |
| Ir25a_F            | TCCAACGATGAACTGGCCCGGT   | 22            | 58.33        | 65.09     | 114                 |
| Ir25a_R            | CGCCTGTGCCAACTGAATGCCA   | 22            | 54.17        | 66.12     |                     |
