# Supplementary material for: Deciphering the olfactory repertoire of the tiger mosquito Aedes albopictus
Source: PubMed Central journal article supplement (PMC5637092; doi:10.1186/s12864-017-4144-1), 2017-10-11
Supplement: 12864_2017_4144_MOESM8_ESM.pdf [file 12864_2017_4144_MOESM8_ESM.pdf]

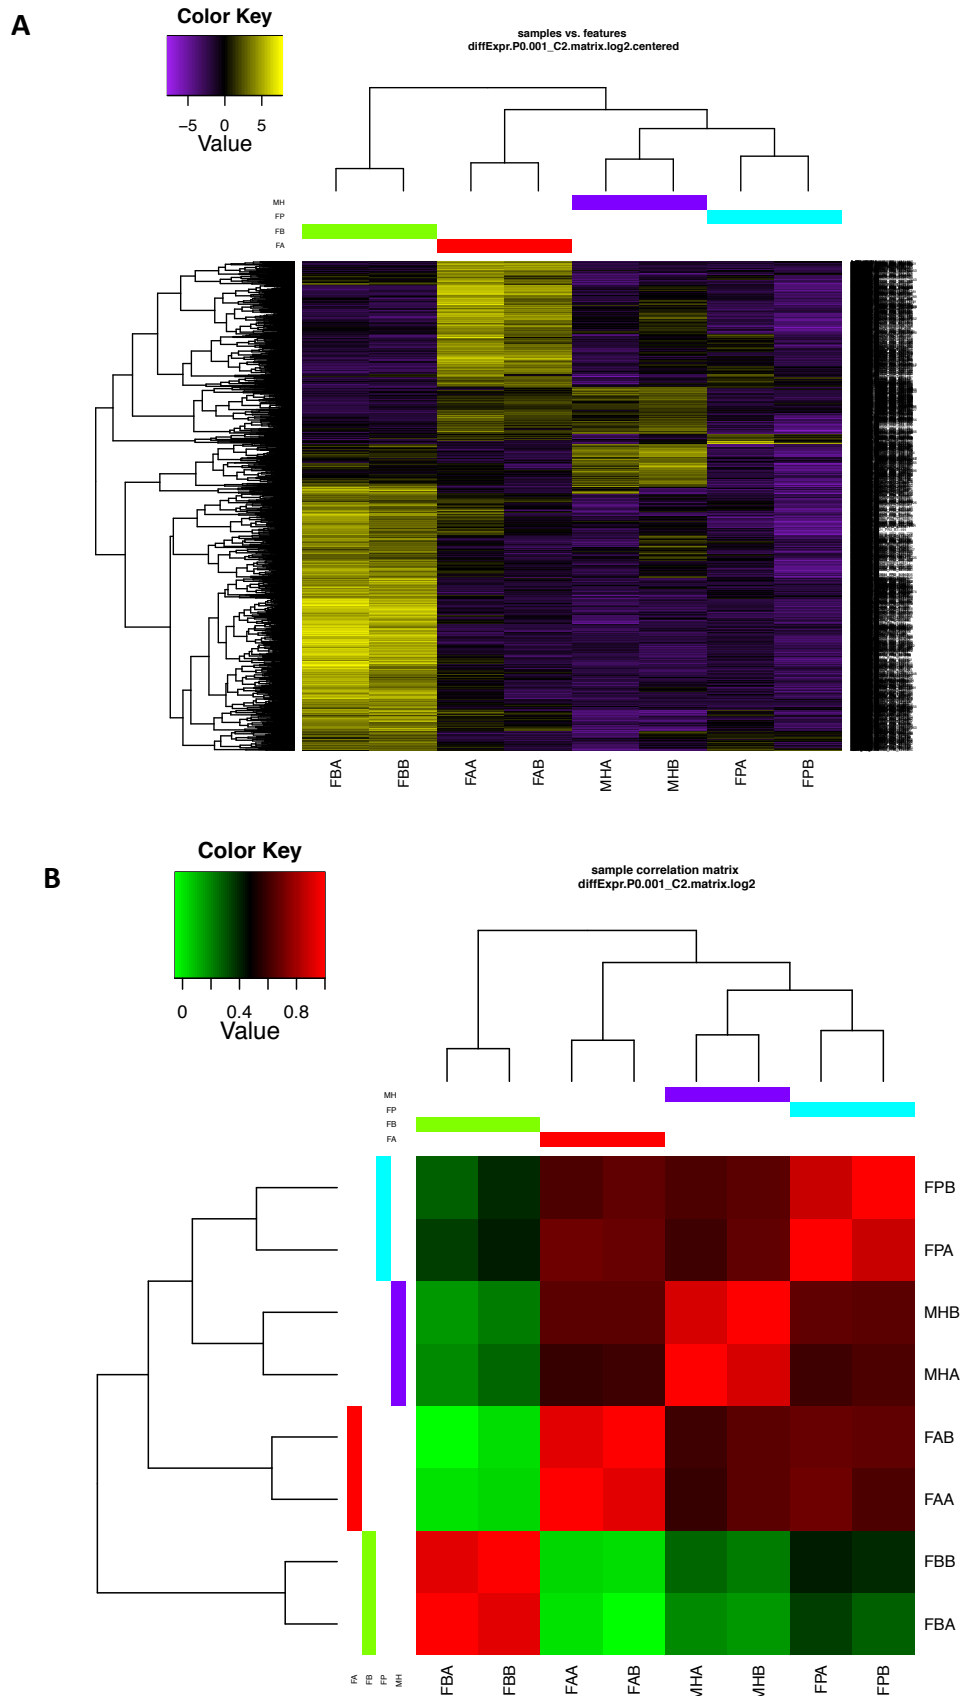

**Figure S1. Differential Expression, cluster analysis and sample correlation matrix. A.** Expression heatmap and cluster analysis generated according to edgeR DE analysis. Only values relative to the 3361 contigs with  $FDR < 0.001$  and  $\log FC > 2$  are shown. **B.** Correlation matrix of the different biological replicates.
