# Supplementary material for: Deciphering the olfactory repertoire of the tiger mosquito Aedes albopictus
Source: PubMed Central journal article supplement (PMC5637092; doi:10.1186/s12864-017-4144-1), 2017-10-11
Supplement: 12864_2017_4144_MOESM9_ESM.pdf [file 12864_2017_4144_MOESM9_ESM.pdf]

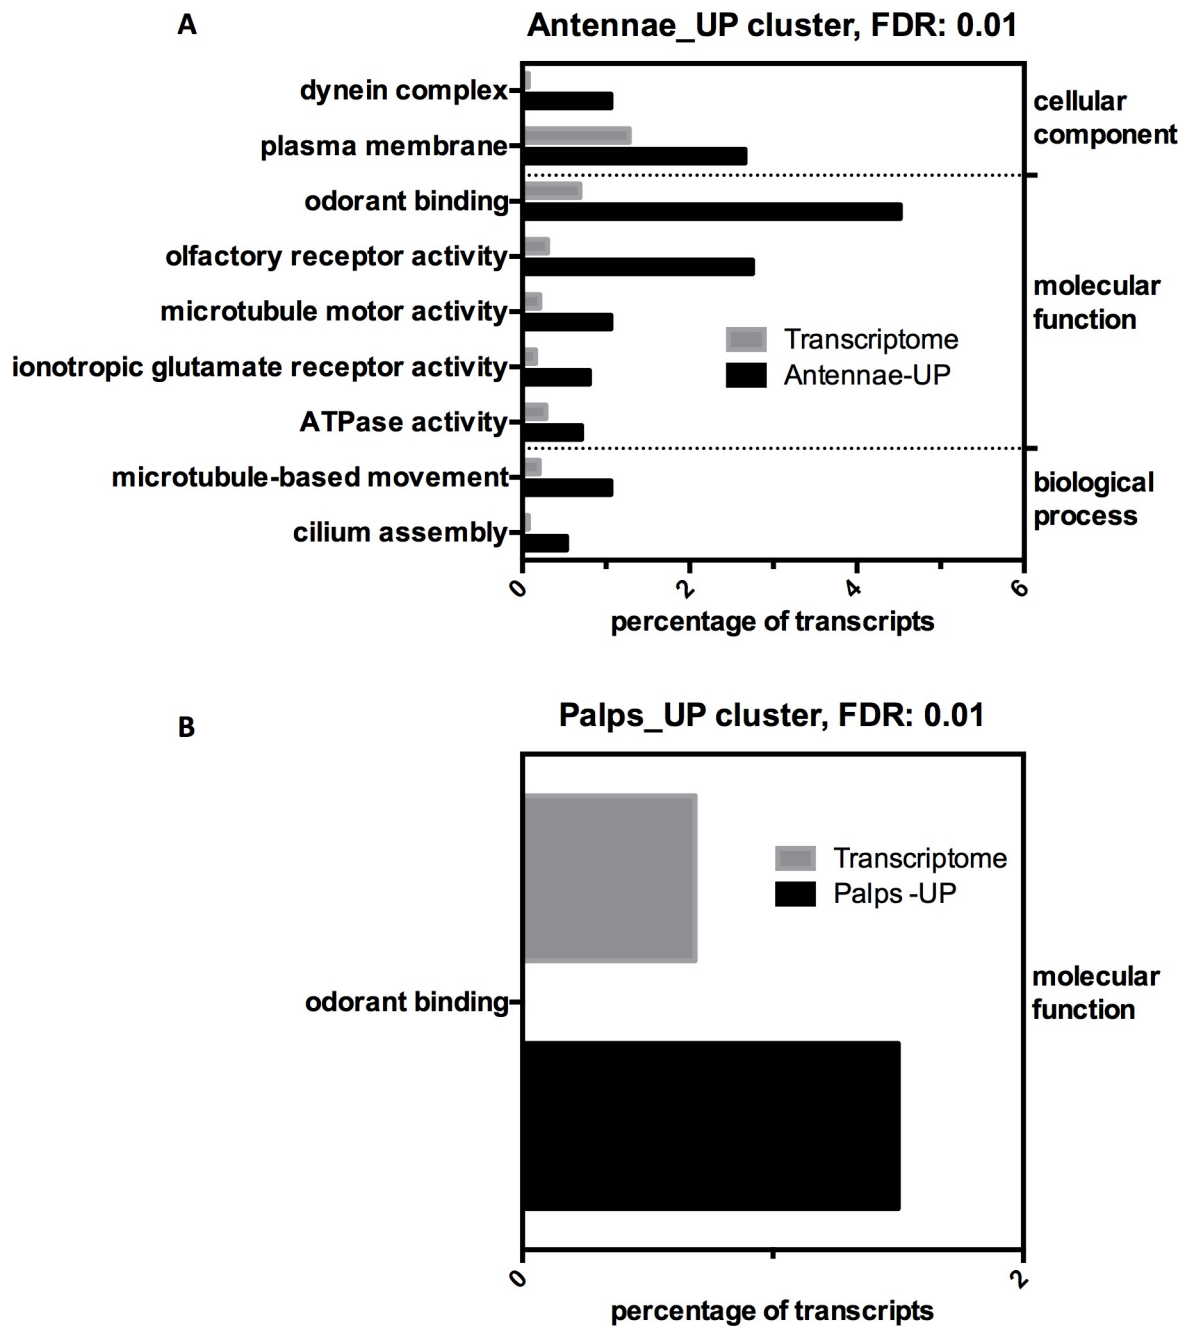

**Figure S2. GO terms enrichment.** GO terms frequency in antennae (A) and palps (B) specific subsets (FDR < 0.01, see Table 2) was compared to GO terms frequency of the transcriptome. GO categories significantly enriched in the antennae (A) and palps (B) subsets are shown.
