# Supplementary material for: Deciphering the olfactory repertoire of the tiger mosquito Aedes albopictus
Source: PubMed Central journal article supplement (PMC5637092; doi:10.1186/s12864-017-4144-1), 2017-10-11
Supplement: 12864_2017_4144_MOESM13_ESM.pdf [file 12864_2017_4144_MOESM13_ESM.pdf]

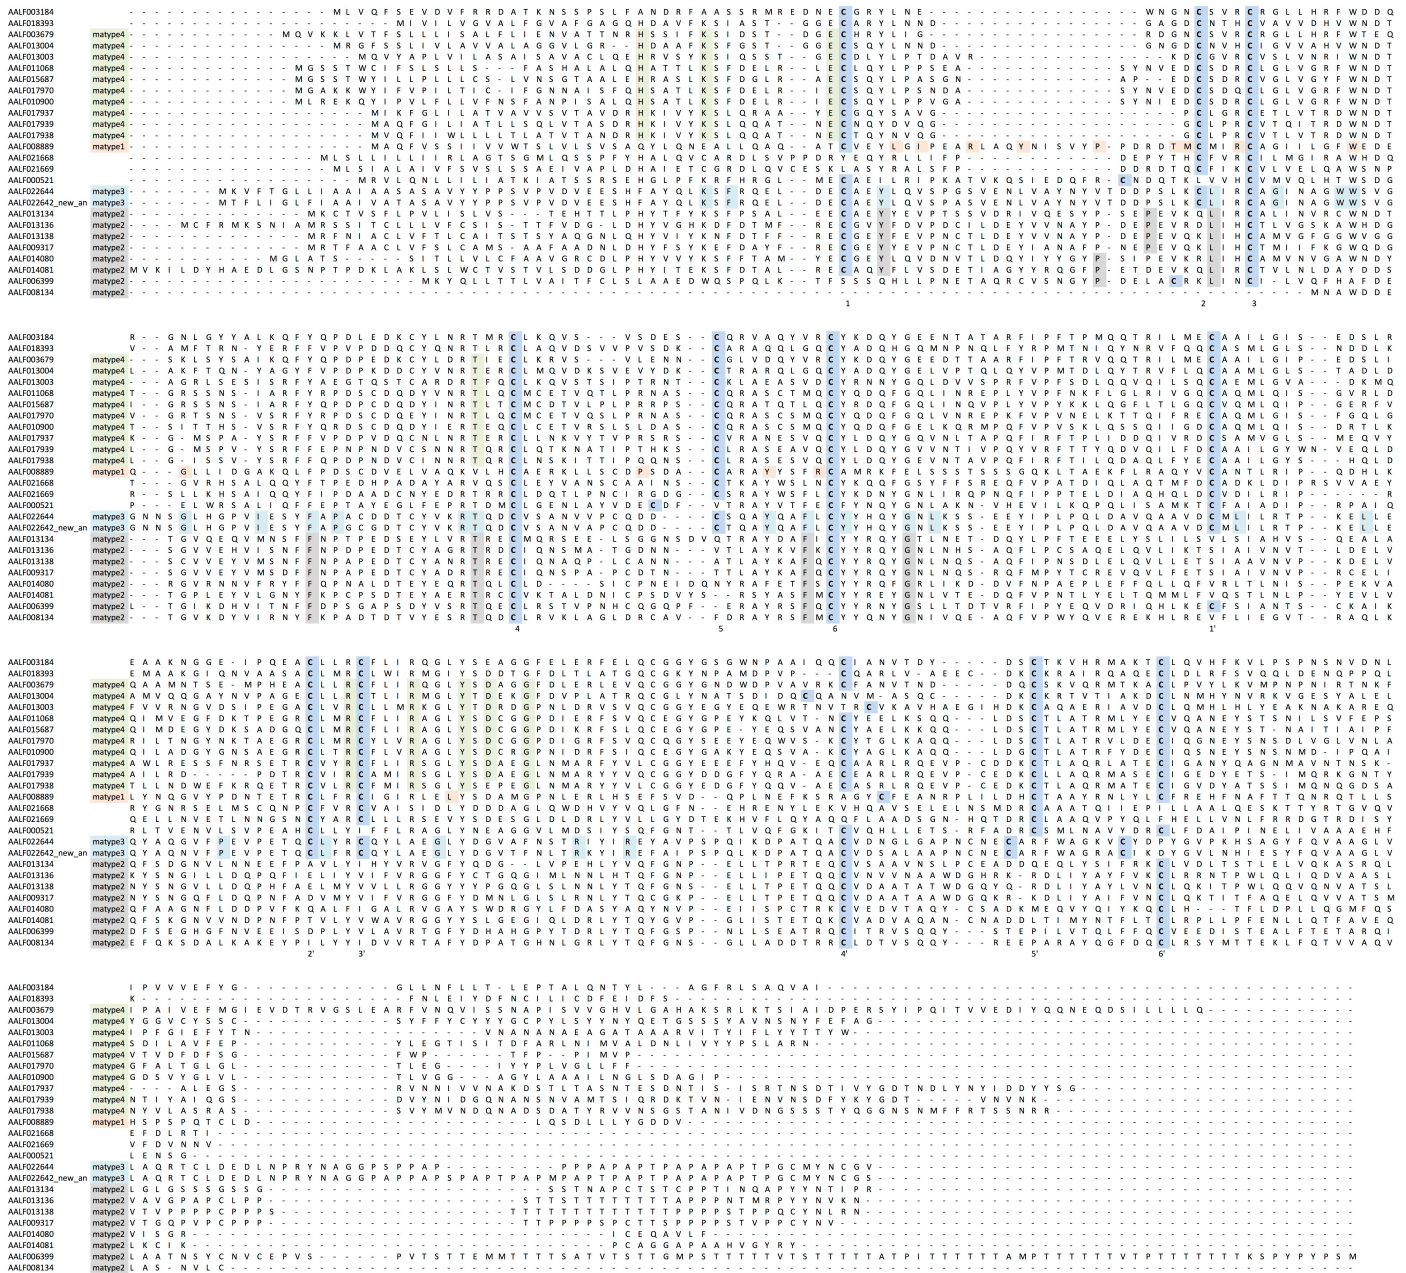

**Figure S5. Alignment of Atypical OBPs.** Clustal Omega alignment of the 26 Atypical OBPs identified in the *Ae. albopictus* transcriptome: sub-families or clusters as identified in Manoharan et al. (2013) are indicated on the left side. Conserved Cysteins are in bold and highlighted in light blue with the numbering reported below. Selected signatures typical of each cluster/subfamily are shown with distinctive colors.
