# Supplementary material for: Deciphering the olfactory repertoire of the tiger mosquito Aedes albopictus
Source: PubMed Central journal article supplement (PMC5637092; doi:10.1186/s12864-017-4144-1), 2017-10-11
Supplement: 12864_2017_4144_MOESM14_ESM.pdf [file 12864_2017_4144_MOESM14_ESM.pdf]

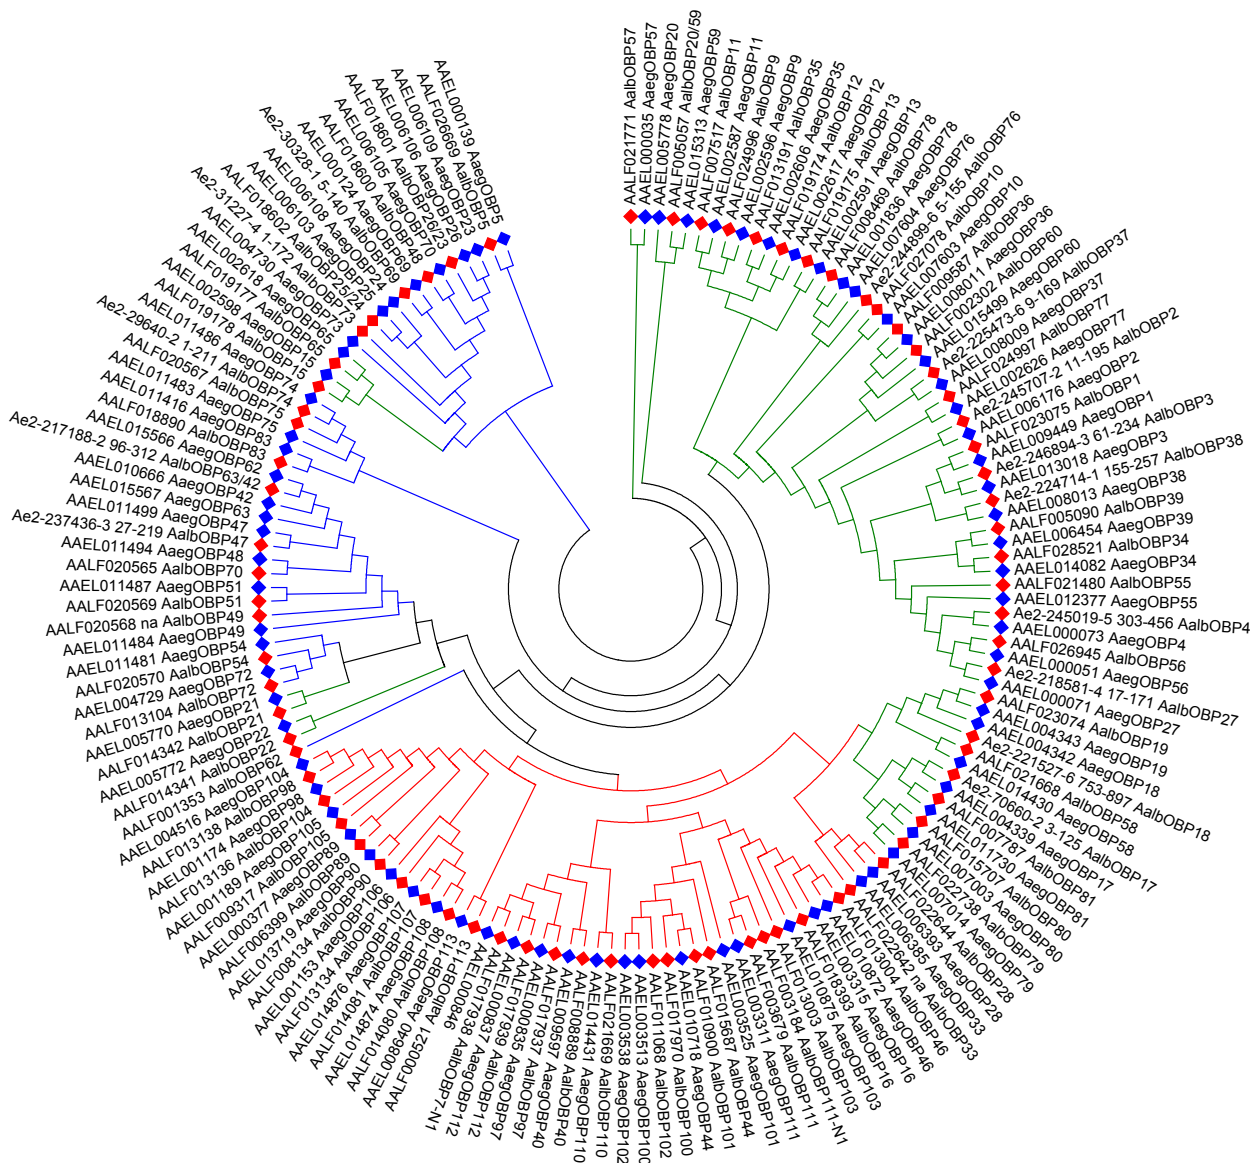

**Figure S6. Phylogram of OBP family members in *Ae. albopictus* and *Ae. aegypti*.** Clades or branches associated to different OBP subfamilies are shown in colors: Classic, green; PlusC, blue; Atypical, red. Red diamonds: *Ae. albopictus* ortholog; blue diamonds: *Ae. aegypti* orthologs.
